# Supplementary material for: Characterization and optimization of pH-responsive polymer nanoparticles for drug delivery to oral biofilms
Source: Royal Society of Chemistry journal article supplement (doi:10.1039/c5tb02054a), 2015-11-20
Supplement: c5tb02054a1.pdf [file c5tb02054a1.pdf]

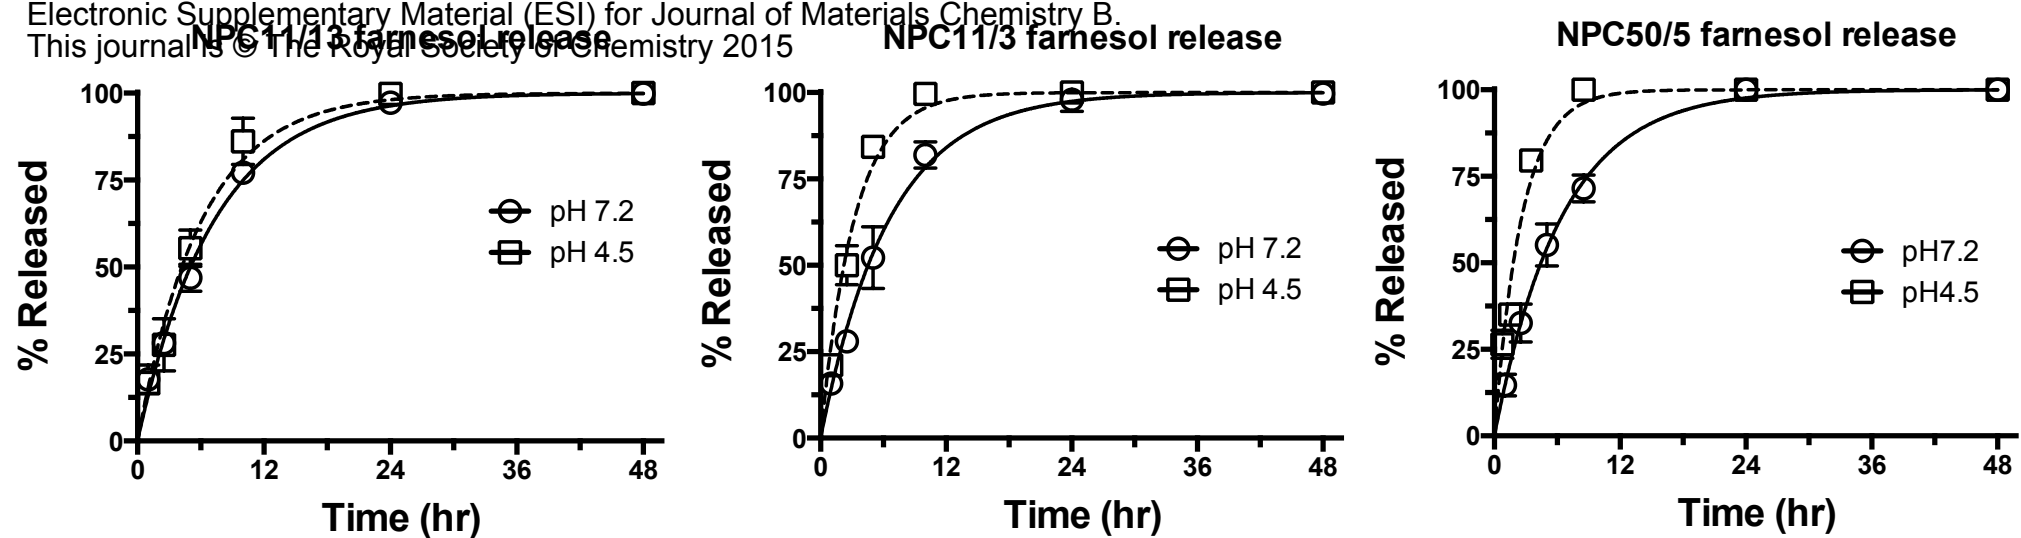

**Supplementary Figure 1.** Farnesol release profiles among NPC with different CCR at pH 7.2 and 4.5. Solid and dotted lines show fits ( $R^2 > 0.98$ ) to first-order drug release. (n=3)
